# Supplementary material for: Body composition, physical fitness and cardiovascular risk factors in 9-year-old children
Source: PubMed Central journal article supplement (PMC8854391; doi:10.1038/s41598-022-06578-w), 2022-02-17
Supplement: 41598_2022_6578_MOESM1_ESM.pdf [file 41598_2022_6578_MOESM1_ESM.pdf]

## Supplementary material

### Body composition, physical fitness and cardiovascular risk factors in 9-year-old children

Pontus Henriksson\*<sup>1</sup>, Johanna Sandborg<sup>1,2</sup>, Maria Henström<sup>2</sup>, Christine Delisle Nyström<sup>2</sup>, Evelina Ek<sup>1</sup>, Francisco B Ortega<sup>3,2,4</sup>, Marie Löf<sup>1,2</sup>

<sup>1</sup> Department of Health, Medicine and Caring Sciences, Linköping University, Linköping, Sweden.

<sup>2</sup> Department of Biosciences and Nutrition, Karolinska Institutet, Huddinge, Stockholm, Sweden.

<sup>3</sup> PROFITH (PROmoting FITness and Health through physical activity) research group, Department of Physical Education and Sports, Faculty of Sport Sciences, Research Institute of Sport and Health, University of Granada, Spain.

<sup>4</sup> Faculty of Sport and Health Sciences, University of Jyväskylä, Jyväskylä, Finland.

\* **Corresponding author:** Pontus Henriksson, Department of Health, Medicine and Caring Sciences, Linköping University, 581 83 Linköping, Sweden. Telephone number: 013-28 10 00. E-mail: [pontus.henriksson@liu.se](mailto:pontus.henriksson@liu.se)

**Table S1.** Sensitivity analysis examining the associations of body composition with metabolic syndrome (MetS score) in 9-year-old children stratified by studies.

| Body composition          | Study                      | Unadjusted |          | Basic adjustment <sup>a</sup> |          | Basic adjustment <sup>a</sup> + fitness <sup>b</sup> |          |
|---------------------------|----------------------------|------------|----------|-------------------------------|----------|------------------------------------------------------|----------|
|                           |                            | $\beta$    | <i>P</i> | $\beta$                       | <i>P</i> | <b>B</b>                                             | <i>P</i> |
| BMI (kg/m <sup>2</sup> )  | All participants (n = 173) | 0.430      | < 0.001  | 0.381                         | < 0.001  | 0.334                                                | < 0.001  |
|                           | Birth cohorts (n = 87)     | 0.343      | 0.001    | 0.330                         | 0.006    | 0.292                                                | 0.060    |
|                           | MINISTOP (n = 86)          | 0.500      | < 0.001  | 0.448                         | < 0.001  | 0.438                                                | < 0.001  |
| FM (%)                    | All participants (n = 172) | 0.389      | < 0.001  | 0.349                         | < 0.001  | 0.312                                                | < 0.001  |
|                           | Birth cohorts (n = 87)     | 0.367      | < 0.001  | 0.352                         | 0.006    | 0.334                                                | 0.023    |
|                           | MINISTOP (n = 85)          | 0.410      | < 0.001  | 0.386                         | < 0.001  | 0.353                                                | 0.003    |
| FMI (kg/m <sup>2</sup> )  | All participants (n = 172) | 0.442      | < 0.001  | 0.388                         | < 0.001  | 0.368                                                | < 0.001  |
|                           | Birth cohorts (n = 87)     | 0.398      | < 0.001  | 0.401                         | 0.002    | 0.388                                                | 0.010    |
|                           | MINISTOP (n = 85)          | 0.479      | < 0.001  | 0.409                         | < 0.001  | 0.412                                                | 0.001    |
| FFMI (kg/m <sup>2</sup> ) | All participants (n = 172) | 0.170      | 0.026    | 0.065                         | 0.39     | -0.015                                               | 0.87     |
|                           | Birth cohorts (n = 87)     | 0.041      | 0.71     | 0.016                         | 0.89     | -0.064                                               | 0.64     |
|                           | MINISTOP (n = 85)          | 0.289      | 0.007    | 0.105                         | 0.33     | 0.050                                                | 0.70     |

$\beta$ , standardized regression coefficient; BMI, body mass index; FFMI, fat-free mass index; FM, fat mass; FMI, fat-mass index.

<sup>a</sup> Adjusted for child's age and sex, maternal educational level and maternal BMI (for models with FMI and FFMI as independent variables, the models were also mutually adjusted for FMI and FFMI).

<sup>b</sup> Additionally adjusted for cardiorespiratory fitness (20 m shuttle run) and handgrip strength.

**Table S2.** Sensitivity analysis examining the associations of physical fitness with metabolic syndrome (MetS score) in 9-year-old children stratified by studies.

| Fitness variables          | Study                      | Unadjusted |          | Basic adjustment <sup>a</sup> |          | Basic adjustment <sup>a</sup> +<br>body composition <sup>b</sup> |          |
|----------------------------|----------------------------|------------|----------|-------------------------------|----------|------------------------------------------------------------------|----------|
|                            |                            | $\beta$    | <i>P</i> | $\beta$                       | <i>P</i> | $\beta$                                                          | <i>P</i> |
| Cardiorespiratory fitness  | All participants (n = 172) | -0.158     | 0.039    | -0.108                        | 0.19     | 0.031                                                            | 0.71     |
|                            | Birth cohorts (n = 86)     | -0.156     | 0.15     | -0.107                        | 0.37     | 0.053                                                            | 0.67     |
|                            | MINISTOP (n = 86)          | -0.154     | 0.16     | -0.095                        | 0.40     | 0.056                                                            | 0.62     |
| Upper body strength        | All participants (n = 173) | 0.188      | 0.013    | 0.229                         | 0.003    | 0.144                                                            | 0.10     |
|                            | Birth cohorts (n = 87)     | 0.169      | 0.12     | 0.189                         | 0.095    | 0.139                                                            | 0.30     |
|                            | MINISTOP (n = 86)          | 0.202      | 0.062    | 0.244                         | 0.024    | 0.106                                                            | 0.39     |
| Lower body strength        | All participants (n = 173) | -0.129     | 0.092    | -0.079                        | 0.32     | 0.017                                                            | 0.83     |
|                            | Birth cohorts (n = 87)     | -0.150     | 0.17     | -0.114                        | 0.32     | -0.062                                                           | 0.59     |
|                            | MINISTOP (n = 86)          | -0.109     | 0.32     | -0.037                        | 0.74     | 0.187                                                            | 0.15     |
| Motor fitness <sup>c</sup> | All participants (n = 173) | -0.249     | 0.001    | -0.186                        | 0.019    | -0.080                                                           | 0.32     |
|                            | Birth cohorts (n = 87)     | -0.167     | 0.12     | -0.097                        | 0.41     | 0.038                                                            | 0.74     |
|                            | MINISTOP (n = 86)          | -0.314     | 0.003    | -0.250                        | 0.023    | 0.088                                                            | 0.47     |

$\beta$ , standardized regression coefficient.

<sup>a</sup> Adjusted for child's age and sex, maternal educational level and maternal BMI.

<sup>b</sup> Additionally adjusted for fat-mass index and fat-free mass index.

<sup>c</sup> Since lower scores indicate higher performance, results are inverted.

**Table S3.** Sensitivity analysis exploring the influence of additional adjustment for child's height on the associations of body composition with cardiovascular risk factors in 9-year-old children.

| Body composition (x)      | CVD risk factors (y) | Basic adjustment <sup>a</sup> + fitness <sup>b</sup> |          | Basic adjustment <sup>a</sup> + fitness <sup>b</sup> + height |          |
|---------------------------|----------------------|------------------------------------------------------|----------|---------------------------------------------------------------|----------|
|                           |                      | $\beta$                                              | <i>P</i> | $\beta$                                                       | <i>P</i> |
| BMI (kg/m <sup>2</sup> )  | Systolic BP          | 0.240                                                | < 0.001  | 0.231                                                         | < 0.001  |
|                           | Diastolic BP         | 0.204                                                | 0.001    | 0.205                                                         | < 0.001  |
|                           | HOMA-IR              | 0.292                                                | 0.002    | 0.292                                                         | 0.002    |
|                           | MetS score           | 0.334                                                | < 0.001  | 0.333                                                         | < 0.001  |
| FM (%)                    | Systolic BP          | 0.248                                                | < 0.001  | 0.238                                                         | < 0.001  |
|                           | Diastolic BP         | 0.231                                                | 0.002    | 0.240                                                         | < 0.001  |
|                           | HOMA-IR              | 0.339                                                | < 0.001  | 0.329                                                         | < 0.001  |
|                           | MetS score           | 0.312                                                | < 0.001  | 0.305                                                         | < 0.001  |
| FMI (kg/m <sup>2</sup> )  | Systolic BP          | 0.206                                                | 0.001    | 0.192                                                         | 0.002    |
|                           | Diastolic BP         | 0.231                                                | < 0.001  | 0.241                                                         | < 0.001  |
|                           | HOMA-IR              | 0.375                                                | < 0.001  | 0.364                                                         | < 0.001  |
|                           | MetS score           | 0.368                                                | < 0.001  | 0.360                                                         | < 0.001  |
| FFMI (kg/m <sup>2</sup> ) | Systolic BP          | 0.069                                                | 0.27     | 0.078                                                         | 0.21     |
|                           | Diastolic BP         | -0.028                                               | 0.66     | -0.034                                                        | 0.59     |
|                           | HOMA-IR              | -0.088                                               | 0.33     | -0.068                                                        | 0.46     |
|                           | MetS score           | -0.015                                               | 0.87     | -0.003                                                        | 0.98     |

$\beta$ , standardized regression coefficient; BP, blood pressure; BMI, body mass index; CVD risk factors, cardiovascular disease risk factors; FFMI, fat-free mass index; FM, fat mass; FMI, fat-mass index; HOMA-IR, Homeostatic Model Assessment of Insulin Resistance; MetS score, metabolic syndrome score.

<sup>a</sup> Adjusted for child's age and sex, maternal educational level and maternal BMI (for models with FMI and FFMI as independent variables, the models were also mutually adjusted for FMI and FFMI).

<sup>b</sup> Additionally adjusted for cardiorespiratory fitness (20 m shuttle run) and handgrip strength.

**Table S4.** Sensitivity analysis examining associations of cardiorespiratory fitness (expressed in VO<sub>2</sub>max and laps) fitness with cardiovascular risk factors in 9-year-old children.

| Fitness variables (x)                           | CVD risk factors (y) | Unadjusted |          | Basic adjustment <sup>a</sup> |          | Basic adjustment <sup>a</sup> + body composition <sup>b</sup> |          |
|-------------------------------------------------|----------------------|------------|----------|-------------------------------|----------|---------------------------------------------------------------|----------|
|                                                 |                      | $\beta$    | <i>P</i> | $\beta$                       | <i>P</i> | $\beta$                                                       | <i>P</i> |
| Cardiorespiratory fitness (VO <sub>2</sub> max) | Systolic BP          | -0.069     | 0.17     | -0.028                        | 0.62     | 0.050                                                         | 0.38     |
|                                                 | Diastolic BP         | -0.022     | 0.65     | 0.036                         | 0.51     | 0.119                                                         | 0.042    |
|                                                 | HOMA-IR              | -0.249     | 0.001    | -0.173                        | 0.047    | -0.039                                                        | 0.66     |
|                                                 | MetS score           | -0.142     | 0.064    | -0.087                        | 0.32     | 0.047                                                         | 0.59     |
| Cardiorespiratory fitness (laps, main analyses) | Systolic BP          | -0.081     | 0.11     | -0.046                        | 0.39     | 0.039                                                         | 0.48     |
|                                                 | Diastolic BP         | -0.028     | 0.57     | 0.013                         | 0.80     | 0.103                                                         | 0.070    |
|                                                 | HOMA-IR              | -0.303     | < 0.001  | -0.216                        | 0.008    | -0.088                                                        | 0.28     |
|                                                 | MetS score           | -0.158     | 0.039    | -0.108                        | 0.19     | 0.031                                                         | 0.71     |

$\beta$ , standardized regression coefficient; BP, blood pressure; CVD risk factors, cardiovascular disease risk factors; HOMA-IR, Homeostatic Model Assessment of Insulin Resistance; MetS score, metabolic syndrome score.

<sup>a</sup> Adjusted for child's age and sex, maternal educational level and maternal BMI.

<sup>b</sup> Additionally adjusted for fat-mass index and fat-free mass index.
